# Supplementary figures and images for: Longitudinal analysis of growth trajectories in young children of Chinese-born immigrant mothers compared with Australian-born mothers living in Victoria, Australia
Source: HighWire-hosted journal article supplement (doi:10.1136/bmjopen-2020-041148), 2021-02-01

Supplementary Figure 1: Flow chart on sample used in study

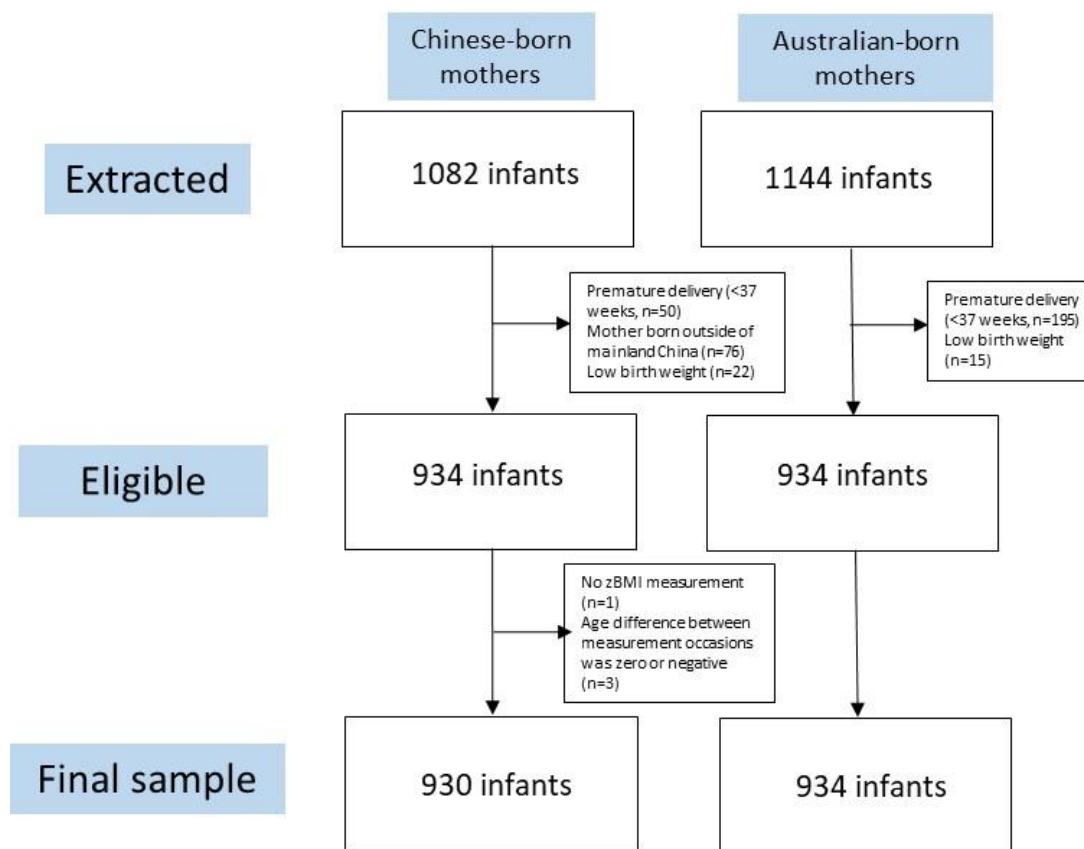

Supplement: bmjopen-2020-041148supp002_data_supplement.pdf [file bmjopen-2020-041148supp002_data_supplement.pdf]
